# Supplementary material
Source: Springer Nature journal article supplement (https://www.springermedizin.de/resource/supplementary/13256_2011_2318_MOESM2_ESM.docx/9649332)
Supplement: MOESM2 [file 9649332]

Table. Antimicrobial drug susceptibility test results for *Mycobacterium abscessus subpecie bolletii* isolate.

| Antimicrobial agent | Minimum inhibitory concentration (MIC) (µg/mL) | Interpretive criteria§ |
| --- | --- | --- |
| Amikacin ‡ | 32 | Intermediate |
| Amoxycillin clavulanate * | >256 | Resistant |
| Cefotaxime † (disk 30 µg) | >64 | Resistant |
| Cefoxitin * | <8 | Susceptible |
| Ciprofloxacin ‡ | >16 | Resistant |
| Clarithromycin ‡ | 16 | Resistant |
| Cotrimoxazole † (disk 1.25/23.75 µg) | >8 | Resistant |
| Erythromycin † (disk 15 µg) | >8 | Resistant |
| Imipenem * | 0,75 | Susceptible |
| Levofloxacin † (disk 5 µg) | >4 | Resistant |
| Linezolid † (disk 30 µg) | >8 | Intermediate/Resistant |
| Minocycline † (disk 30 µg) | <4 | Susceptible |
| Ofloxacin † (disk 5 µg) | >8 | Resistant |
| Teicoplanin * | >256 | Resistant |
| Tobramycin † (disk 10 µg) | >8 | Resistant |
| Tigecycline * | >256 | Resistant |
| Vancomycin * | >256 | Resistant |

* E-test (AB Biodisk) at 30°C for 72 h [2]

‡ Broth microdilution

† Disk diffusion

§ see reference 7
